# Supplementary material
Source: Springer Nature journal article supplement (https://www.springermedizin.de/resource/supplementary/12883_2011_506_MOESM6_ESM.pdf/9455290)

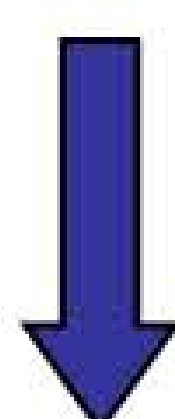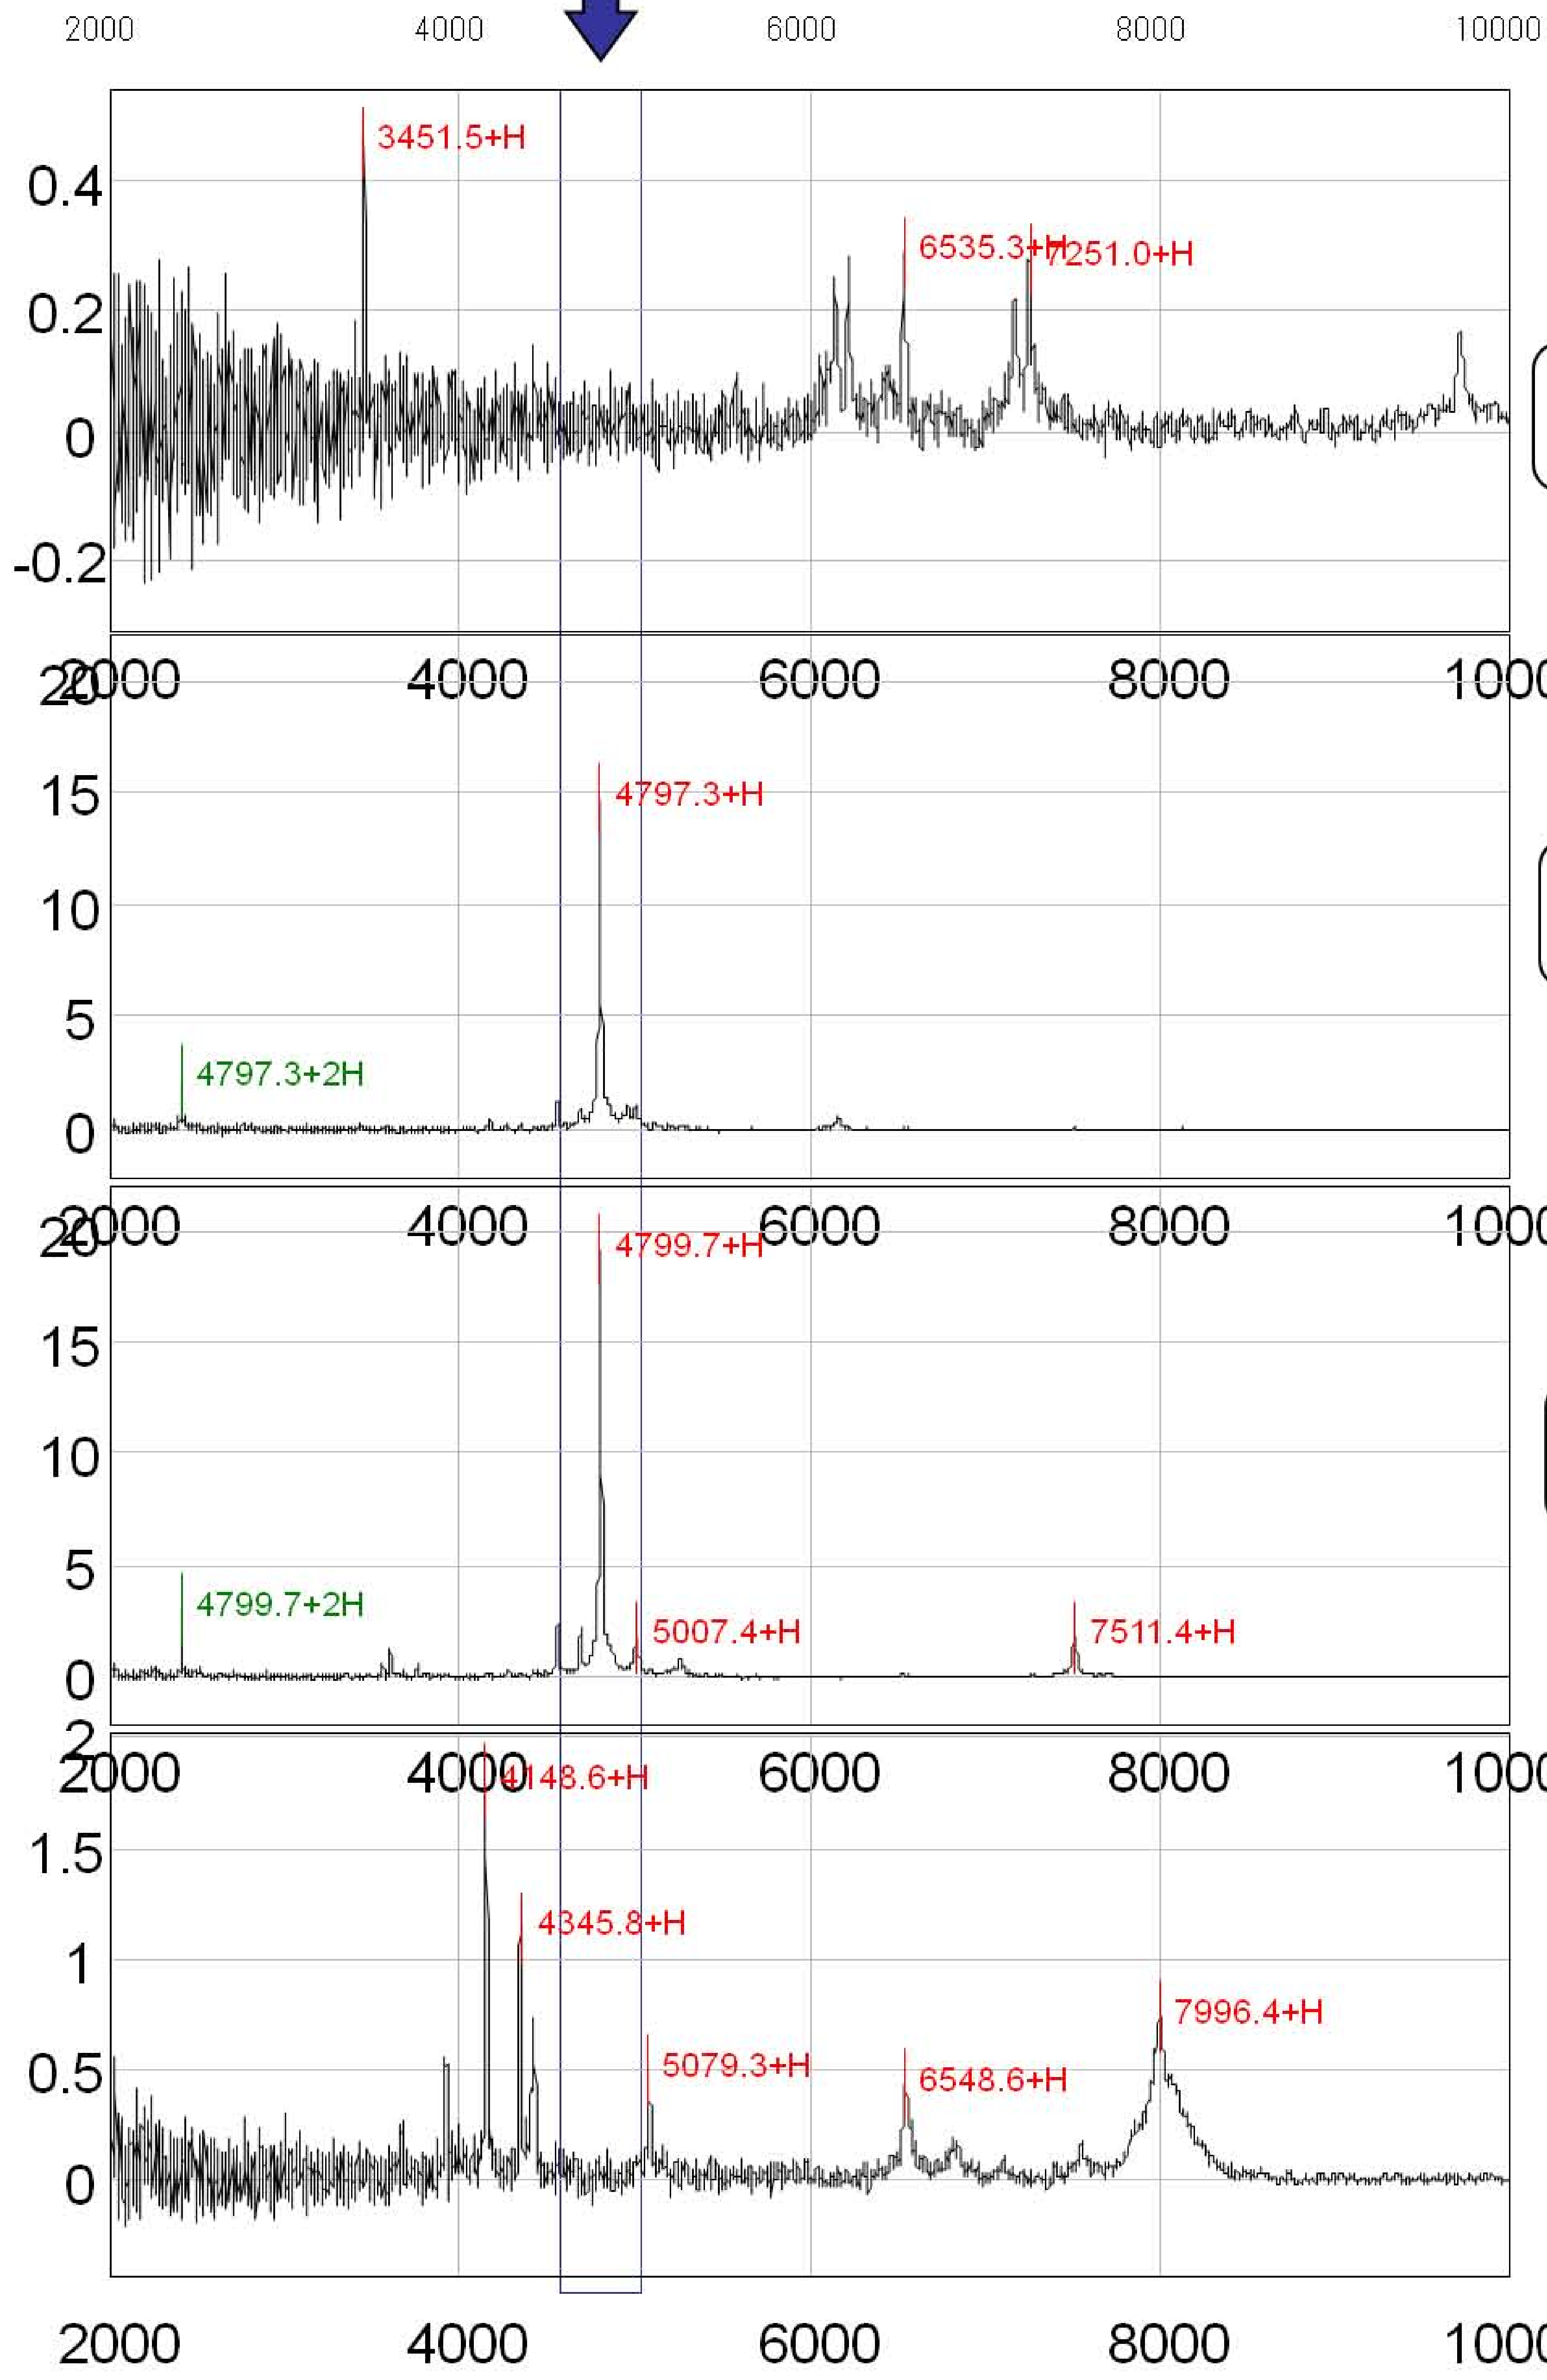

Fraction 25

Fraction 26

Fraction 27

Fraction 28

Supplement: MOESM6 [file 9455290]
